# Supplementary material for: Derivation and external validation of a simple risk score to predict in-hospital mortality in patients hospitalized for COVID-19: A multicenter retrospective cohort study
Source: PubMed Central journal article supplement — Medicine (Baltimore). 2021 Oct 8;100(40):e27422. doi: 10.1097/MD.0000000000027422 (PMC8500634; doi:10.1097/md.0000000000027422), 2021-10-08
Supplement: medi-100-e27422-s004.pdf [file medi-100-e27422-s004.pdf]

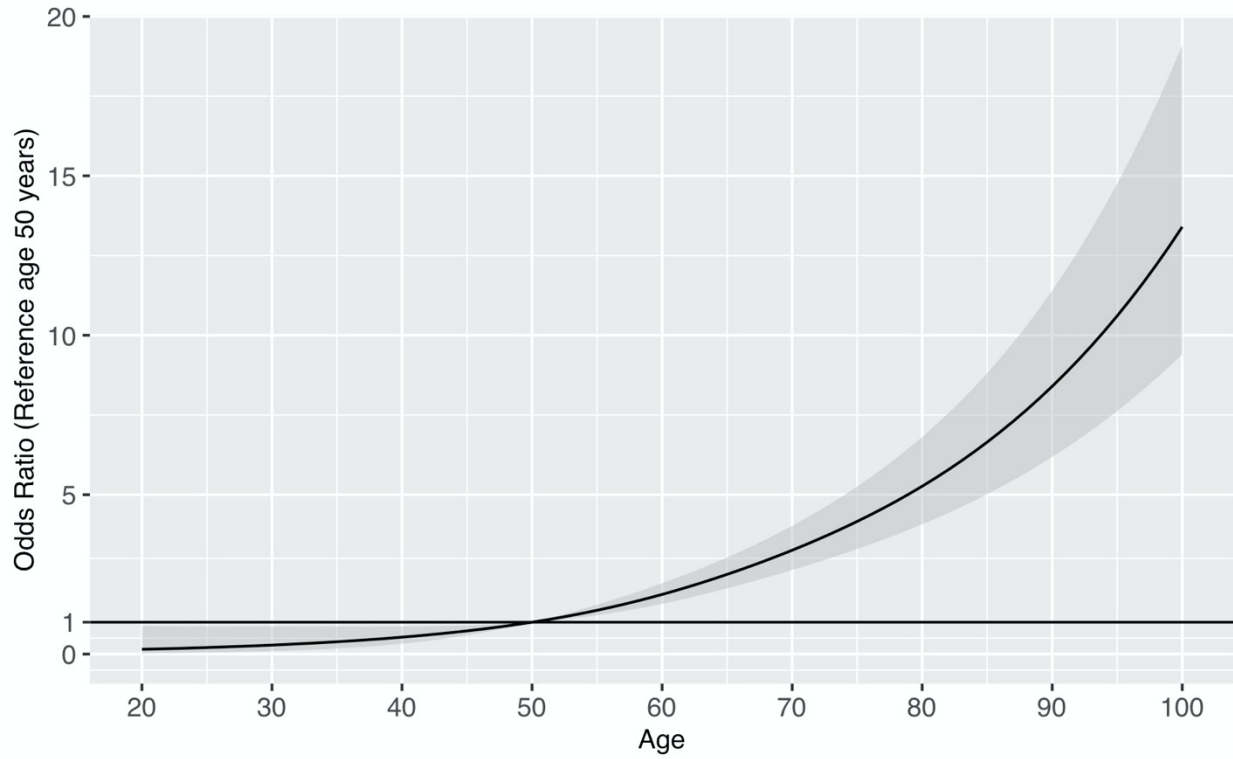

**eFigure 4. Odds ratio and 95% confidence interval for age in final risk model with a reference age of 50 years old.** The grey shaded region represents the 95% confidence interval for the odds ratio.
