# Supplementary material for: Derivation and external validation of a simple risk score to predict in-hospital mortality in patients hospitalized for COVID-19: A multicenter retrospective cohort study
Source: PubMed Central journal article supplement — Medicine (Baltimore). 2021 Oct 8;100(40):e27422. doi: 10.1097/MD.0000000000027422 (PMC8500634; doi:10.1097/md.0000000000027422), 2021-10-08
Supplement: medi-100-e27422-s005.pdf [file medi-100-e27422-s005.pdf]

| <b>Category</b>            | <b>Variable</b>                                                                |                                               |
|----------------------------|--------------------------------------------------------------------------------|-----------------------------------------------|
| Demographics and admission | Age                                                                            |                                               |
|                            | Gender                                                                         |                                               |
|                            | Race                                                                           |                                               |
|                            | Ethnicity                                                                      |                                               |
|                            | Admission reason                                                               |                                               |
|                            | Prior residence                                                                |                                               |
|                            | How did the patient arrive to the ED?                                          |                                               |
|                            | BMI                                                                            |                                               |
| History                    | Smoking history                                                                |                                               |
|                            | Vaping history                                                                 |                                               |
|                            | Left ventricular ejection fraction documented prior to admission?              |                                               |
|                            | Does the patient have a history of Aortic Stenosis?                            |                                               |
|                            | Has the patient received any type of dialysis prior to the hospital encounter? |                                               |
|                            | Has the patient been on a home ventilator prior to the hospital encounter?     |                                               |
|                            | Is the patient on home oxygen?                                                 |                                               |
|                            | Is the patient a healthcare worker?                                            |                                               |
|                            | Is the patient a service worker?                                               |                                               |
|                            | Previously treated by an opioid                                                |                                               |
|                            | Previously treated by a benzodiazepine                                         |                                               |
|                            | Previously treated by a sedative                                               |                                               |
| Comorbidities              | AIDS or HIV                                                                    |                                               |
|                            | Diabetes - Uncomplicated                                                       |                                               |
|                            | Hypertension                                                                   |                                               |
|                            | Hemiplegia or Paraplegia                                                       |                                               |
|                            | Inflammatory Bowel Disease (i.e., Crohns or Ulcerative Colitis)                |                                               |
|                            | Leukemia                                                                       |                                               |
|                            | Lymphoma                                                                       |                                               |
|                            | Any Malignancy without Metastasis                                              |                                               |
|                            | Metastatic Solid Tumor                                                         |                                               |
|                            | Mild Liver Disease                                                             |                                               |
|                            | Moderate or Severe Liver Disease                                               |                                               |
|                            | Asthma                                                                         |                                               |
|                            | Moderate or Severe Kidney Disease                                              |                                               |
|                            | Myocardial Infarction (MI) (history of/prior event)                            |                                               |
|                            | Transplant                                                                     |                                               |
|                            | Peptic Ulcer Disease                                                           |                                               |
|                            | Peripheral Vascular Disorders                                                  |                                               |
|                            | Rheumatoid Arthritis or Arthropathy/Connective Tissue                          |                                               |
|                            | Venous Thromboembolism (DVT/PE)                                                |                                               |
|                            | Cardiovascular Disease                                                         |                                               |
|                            | Cerebrovascular Disease                                                        |                                               |
|                            | Chronic obstructive pulmonary disease (COPD)                                   |                                               |
|                            | Congestive heart failure (CHF)/Cardiomyopathy                                  |                                               |
|                            | Chronic Pulmonary Disease (other than asthma or COPD)                          |                                               |
|                            | Dementia                                                                       |                                               |
|                            | Diabetes - Complicated                                                         |                                               |
|                            | Number of comorbidities                                                        |                                               |
|                            | Symptoms                                                                       | Fever (measured temperature 99.0 - 100.4 [F]) |
|                            |                                                                                | Fatigue                                       |
|                            |                                                                                | Diarrhea                                      |
| Nausea/vomiting            |                                                                                |                                               |
| Altered Mental Status      |                                                                                |                                               |

| <b>Category</b>                                                                                   | <b>Variable</b>                             |
|---------------------------------------------------------------------------------------------------|---------------------------------------------|
| Symptoms cont.                                                                                    | None of the above                           |
|                                                                                                   | Fever (measured temperature >100.4 [F])     |
|                                                                                                   | Subjective fever                            |
|                                                                                                   | Generalized malaise                         |
|                                                                                                   | Weakness                                    |
|                                                                                                   | Loss of taste                               |
|                                                                                                   | Dyspnea / shortness of breath               |
|                                                                                                   | Loss of smell                               |
|                                                                                                   | Hypoxia / new or escalated O2 requirement   |
|                                                                                                   | Cough (New or Worsening)                    |
|                                                                                                   | Non-pleuritic chest pain                    |
|                                                                                                   | Pleuritic chest pain                        |
|                                                                                                   | Sputum productions                          |
|                                                                                                   | Rhinorrhea                                  |
| Myalgias                                                                                          |                                             |
| Chief Complaint                                                                                   | Difficulty breathing or shortness of breath |
|                                                                                                   | Cough                                       |
|                                                                                                   | Fever                                       |
|                                                                                                   | Chest pain                                  |
|                                                                                                   | Nausea or vomiting                          |
|                                                                                                   | Diarrhea                                    |
| Other chief complaint                                                                             |                                             |
| First recorded vitals during the hospital encounter (vital signs from ED if admitted from the ED) | Temperature                                 |
|                                                                                                   | Heart rate                                  |
|                                                                                                   | Respiratory rate                            |
|                                                                                                   | Systolic blood pressure                     |
|                                                                                                   | Diastolic blood pressure                    |
|                                                                                                   | Pulse oximetry                              |
| Triage score                                                                                      |                                             |
| Labs from day 1 or day 2 of hospitalization (first available)                                     | Highest Lactate                             |
|                                                                                                   | Highest Creatinine                          |
|                                                                                                   | Highest Alanine Amino Transferase (ALT)     |
|                                                                                                   | Highest Total Bilirubin                     |
|                                                                                                   | Highest White Blood Cell (WBC)              |
|                                                                                                   | Highest Troponin                            |
|                                                                                                   | Highest Brain Natriuretic Peptide (BNP)     |
|                                                                                                   | Highest Ferritin                            |
|                                                                                                   | Highest C-reactive protein (CRP)            |
|                                                                                                   | Highest Lactic Acid Dehydrogenase (LDH)     |
|                                                                                                   | Highest Procalcitonin                       |
|                                                                                                   | Highest Hemoglobin (Hgb)                    |
|                                                                                                   | Lowest Platelet                             |
|                                                                                                   | Lowest Absolute Lymphocyte Count            |
| Lowest pH                                                                                         |                                             |
| Highest Fibrinogen                                                                                |                                             |
| Highest Interleukin 6 (IL-6)                                                                      |                                             |
| Highest erythrocyte sedimentation rate (ESR)                                                      |                                             |
| Chest x-ray results from day 1 or day 2 of hospitalization (first available)                      | Air Spaced Density Disease                  |
|                                                                                                   | Loculations                                 |
|                                                                                                   | New or Worsening Infiltrates                |
|                                                                                                   | Nodular Airspace Disease                    |
| Mass                                                                                              |                                             |

| Category                                                                     | Variable                                                |
|------------------------------------------------------------------------------|---------------------------------------------------------|
| Chest x-ray results from day 1 or day 2 of hospitalization (first available) | Pleural Effusion                                        |
|                                                                              | Pneumonia                                               |
|                                                                              | Pulmonary Edema                                         |
|                                                                              | Pulmonary Vascular Congestion                           |
|                                                                              | No Evidence of Pneumonia                                |
|                                                                              | No Change from Previous/No Interval Change              |
|                                                                              | Atelectasis                                             |
|                                                                              | Normal/No Abnormalities                                 |
|                                                                              | None of the Above Statements                            |
|                                                                              | Post Obstructive Pneumonia                              |
|                                                                              | Necrotizing Pneumonia                                   |
|                                                                              | Nodules                                                 |
|                                                                              | Aspiration                                              |
|                                                                              | Aspiration Pneumonia                                    |
|                                                                              | Bronchial Wall Thickening/Pleural Thickening            |
|                                                                              | Bronchiectasis                                          |
|                                                                              | Emphysema/Emphysematous Changes                         |
|                                                                              | Bronchopneumonia                                        |
|                                                                              | Hyperinflation                                          |
|                                                                              | Infection (Cannot Rule Out Infection, Likely Infection) |
|                                                                              | Infiltrate (Not Specified)                              |
|                                                                              | Interstitial Lung Disease/Interstitial Disease          |
|                                                                              | Neoplasm/Metastatic Disease/Malignancy                  |
|                                                                              | Mucus Plugging/Plugging                                 |
|                                                                              | Pneumonitis                                             |
|                                                                              | Tree in Bud                                             |
|                                                                              | Interval Improvement or Resolution                      |
|                                                                              | Abscess                                                 |
|                                                                              | Cannot Rule Out Pneumonia                               |
|                                                                              | Granuloma                                               |
|                                                                              | Opacities (central)                                     |
|                                                                              | Opacities (peripheral)                                  |
|                                                                              | Opacities (subpleural)                                  |
|                                                                              | Opacities (Not specified)                               |
|                                                                              | Cavitation                                              |
|                                                                              | Consolidation                                           |
|                                                                              | Ground Glass                                            |
|                                                                              | Infiltrate (Single Lobe)                                |
|                                                                              | Infiltrate (Multiple Lobes)                             |
|                                                                              | Other abnormal finding                                  |
| Any pneumonia indication on chest x-ray                                      |                                                         |

**eTable 1: List of predictive factors in the Mi-COVID19 data registry considered.**
