# Supplementary material for: Derivation and external validation of a simple risk score to predict in-hospital mortality in patients hospitalized for COVID-19: A multicenter retrospective cohort study
Source: PubMed Central journal article supplement — Medicine (Baltimore). 2021 Oct 8;100(40):e27422. doi: 10.1097/MD.0000000000027422 (PMC8500634; doi:10.1097/md.0000000000027422), 2021-10-08
Supplement: medi-100-e27422-s006.pdf [file medi-100-e27422-s006.pdf]

| Hospital ID | Data Set Specific Characteristics |                     |                         |                              | General Characteristics |            |                    |                                |
|-------------|-----------------------------------|---------------------|-------------------------|------------------------------|-------------------------|------------|--------------------|--------------------------------|
|             | Full Sample Size                  | Complete Cases Size | COVID-19 Mortality Rate | Discharge Date Range in Data | Bed Size                | Discharges | Teaching Hospital? | Hospital Type                  |
| A           | 269                               | 260                 | 0.15                    | 3/17 - 5/26                  | 1,059                   | 44,920     | Yes                | Voluntary non-profit - Private |
| B           | 155                               | 142                 | 0.21                    | 3/18 - 5/20                  | 537                     | 30,614     | Yes                | Voluntary non-profit - Church  |
| C           | 110                               | 109                 | 0.13                    | 3/28 - 7/20                  | 109                     | 32,636     | Yes                | Voluntary non-profit - Other   |
| D           | 108                               | 102                 | 0.14                    | 3/15 - 5/15                  | 1,070                   | 61,758     | Yes                | Voluntary non-profit - Private |
| E           | 96                                | 91                  | 0.17                    | 4/04 - 8/14                  | 196                     | 9,307      | No                 | Voluntary non-profit - Private |
| F           | 90                                | 89                  | 0.11                    | 3/13 - 6/21                  | 283                     | 15,855     | Yes                | Voluntary non-profit - Church  |
| G           | 91                                | 88                  | 0.11                    | 3/21 - 6/06                  | 317                     | 15,093     | Yes                | Voluntary non-profit - Private |
| H           | 88                                | 85                  | 0.49                    | 3/21 - 4/10                  | 404                     | 18,345     | Yes                | Proprietary                    |
| I           | 83                                | 79                  | 0.28                    | 3/19 - 6/01                  | 443                     | 19,102     | Yes                | Voluntary non-profit - Private |
| J           | 82                                | 78                  | 0.11                    | 3/20 - 5/03                  | 443                     | 17,240     | Yes                | Voluntary non-profit - Other   |
| K           | 72                                | 71                  | 0.08                    | 3/18 - 5/04                  | 250                     | 12,186     | Yes                | Voluntary non-profit - Private |
| L           | 69                                | 68                  | 0.25                    | 3/16 - 5/14                  | 632                     | 30,354     | Yes                | Voluntary non-profit - Private |
| M           | 67                                | 65                  | 0.15                    | 3/16 - 4/30                  | 330                     | 13,159     | Yes                | Voluntary non-profit - Private |
| N           | 66                                | 65                  | 0.12                    | 3/19 - 5/09                  | 458                     | 34,863     | Yes                | Voluntary non-profit - Private |
| O           | 62                                | 61                  | 0.19                    | 3/23 - 5/01                  | 158                     | 7,704      | Yes                | Proprietary                    |
| P           | 67                                | 58                  | 0.37                    | 3/18 - 5/21                  | 304                     | 15,804     | Yes                | Voluntary non-profit - Private |
| Q           | 54                                | 48                  | 0.07                    | 3/16 - 6/23                  | 189                     | 8,639      | No                 | Voluntary non-profit - Private |
| R           | 45                                | 45                  | 0.31                    | 3/22 - 6/04                  | 378                     | 17,969     | Yes                | Voluntary non-profit - Private |
| S           | 49                                | 42                  | 0.27                    | 3/22 - 5/09                  | 434                     | 26,705     | Yes                | Voluntary non-profit - Private |
| T           | 46                                | 44                  | 0.54                    | 3/23 - 4/19                  | 273                     | 10,815     | Yes                | Proprietary                    |
| V-A         | 39                                | 39                  | 0.21                    | 3/18 - 7/07                  | 391                     | 21,759     | Yes                | Voluntary non-profit - Other   |
| V-B         | 39                                | 36                  | 0.33                    | 3/17 - 4/22                  | 584                     | 19,882     | Yes                | Proprietary                    |
| V-C         | 37                                | 35                  | 0.24                    | 3/20 - 4/14                  | 215                     | 7,797      | Yes                | Voluntary non-profit - Private |
| V-D         | 37                                | 33                  | 0.27                    | 3/16 - 4/05                  | 877                     | 35,908     | Yes                | Voluntary non-profit - Private |
| V-E         | 33                                | 32                  | 0.12                    | 3/17 - 4/22                  | 189                     | 6,142      | Yes                | Voluntary non-profit - Private |
| V-F         | 30                                | 30                  | 0.17                    | 3/21 - 5/10                  | 193                     | 9,816      | Yes                | Voluntary non-profit - Private |
| V-G         | 29                                | 28                  | 0.07                    | 4/02 - 5/22                  | 208                     | 10,476     | Yes                | Voluntary non-profit - Private |
| V-H         | 23                                | 22                  | 0.26                    | 3/16 - 4/12                  | 361                     | 18,166     | Yes                | Voluntary non-profit - Private |

|     |    |    |      |             |     |        |     |                                |
|-----|----|----|------|-------------|-----|--------|-----|--------------------------------|
| V-I | 21 | 21 | 0.24 | 3/22 - 6/03 | 136 | 2,767  | Yes | Voluntary non-profit - Other   |
| V-J | 22 | 20 | 0.00 | 3/14 - 4/12 | 191 | 12,260 | Yes | Voluntary non-profit - Private |
| V-K | 20 | 19 | 0.05 | 3/05 - 5/11 | 133 | 3,763  | No  | Voluntary non-profit - Private |
| V-L | 19 | 18 | 0.16 | 3/27 - 5/02 | 179 | 7,254  | No  | Proprietary                    |
| V-M | 16 | 16 | 0.06 | 4/06 - 6/12 | 79  | 3,349  | Yes | Voluntary non-profit - Private |
| V-N | 18 | 15 | 0.22 | 3/23 - 5/26 | 360 | 14,206 | Yes | Voluntary non-profit - Private |
| V-O | 13 | 12 | 0.08 | 4/01 - 4/20 | 186 | 11,579 | Yes | Voluntary non-profit - Private |
| V-P | 12 | 10 | 0.17 | 4/05 - 6/11 | 328 | 15,767 | Yes | Voluntary non-profit - Other   |
| V-Q | 7  | 6  | 0.43 | 4/14 - 6/17 | 139 | 4,362  | No  | Proprietary                    |
| V-R | 7  | 5  | 0.00 | 3/13 - 4/17 | 310 | 11,233 | Yes | Voluntary non-profit - Private |
| V-S | 1  | 1  | 1.00 | 4/14 - 4/14 | 78  | 4,953  | No  | Voluntary non-profit - Other   |
| V-T | 1  | 0  | 1.00 | 3/28 - 3/28 | 365 | 18,252 | Yes | Voluntary non-profit - Other   |

Hospitals are ordered by the complete cases sample size for the final risk score model used. "Full Sample" is the sample size available before removing observations with missing data for the variables in the final model. The mortality rate is calculated using the full sample. A "V" at the beginning of a hospital ID indicates that that hospital was in the validation set. Hospital V-T was not included in the final validation set because there were no complete cases for that hospital.

**eTable 2: Characteristics of hospitals in the Mi-COVID19 data registry.**
