# Supplementary material for: Derivation and external validation of a simple risk score to predict in-hospital mortality in patients hospitalized for COVID-19: A multicenter retrospective cohort study
Source: PubMed Central journal article supplement — Medicine (Baltimore). 2021 Oct 8;100(40):e27422. doi: 10.1097/MD.0000000000027422 (PMC8500634; doi:10.1097/md.0000000000027422), 2021-10-08
Supplement: medi-100-e27422-s007.pdf [file medi-100-e27422-s007.pdf]

| Characteristic                                          | Overall            | Dataset            |                    |
|---------------------------------------------------------|--------------------|--------------------|--------------------|
|                                                         | [N = 2193]         | Derivation         | Validation         |
|                                                         | mean/No. (SD/%)    | [N = 1769]         | [N = 424]          |
|                                                         | [n*]               |                    |                    |
| Age                                                     | 63.9 (16.8) [2193] | 64.4 (16.7) [1769] | 61.5 (17.3) [424]  |
| Gender (female)                                         | 1046 (48%) [2193]  | 830 (47%) [1769]   | 216 (51%) [424]    |
| Race (yes)                                              |                    |                    |                    |
| Black                                                   | 1024 (49%) [2101]  | 840 (49%) [1698]   | 184 (46%) [403]    |
| White                                                   | 949 (45%) [2101]   | 744 (44%) [1698]   | 205 (51%) [403]    |
| Asian                                                   | 52 (2%) [2101]     | 45 (3%) [1698]     | 7 (2%) [403]       |
| Native American or Pacific Islander                     | 10 (0%) [2101]     | 10 (1%) [1698]     | 0 (0%) [403]       |
| Other                                                   | 66 (3%) [2101]     | 59 (3%) [1698]     | 7 (2%) [403]       |
| Ethnicity (yes)                                         |                    |                    |                    |
| Hispanic                                                | 113 (5%) [2185]    | 92 (5%) [1762]     | 21 (5%) [423]      |
| Non-Hispanic                                            | 1907 (87%) [2185]  | 1535 (87%) [1762]  | 372 (88%) [423]    |
| Unknown                                                 | 165 (8%) [2185]    | 135 (8%) [1762]    | 30 (7%) [423]      |
| Residing in a Nursing Facility or Assisted Living (yes) | 408 (19%) [2164]   | 340 (19%) [1748]   | 68 (16%) [416]     |
| Ever-smoker (yes)                                       | 809 (40%) [2041]   | 645 (39%) [1648]   | 164 (42%) [393]    |
| BMI                                                     | 32.6 (60.4) [2079] | 31.2 (8.5) [1680]  | 38.7 (136.7) [399] |
| No. of comorbidities                                    |                    |                    |                    |
| 0                                                       | 289 (13%) [2187]   | 228 (13%) [1769]   | 61 (15%) [418]     |
| 1                                                       | 420 (19%) [2187]   | 341 (19%) [1769]   | 79 (19%) [418]     |
| 2                                                       | 462 (21%) [2187]   | 369 (21%) [1769]   | 93 (22%) [418]     |
| 3                                                       | 375 (17%) [2187]   | 299 (17%) [1769]   | 76 (18%) [418]     |
| 4                                                       | 269 (12%) [2187]   | 225 (13%) [1769]   | 44 (11%) [418]     |
| >4                                                      | 372 (17%) [2187]   | 307 (17%) [1769]   | 65 (16%) [418]     |
| Presence of comorbidity (yes)                           |                    |                    |                    |
| Cardiovascular disease                                  | 596 (27%) [2187]   | 485 (27%) [1769]   | 111 (27%) [418]    |
| Congestive heart failure                                | 334 (15%) [2187]   | 275 (16%) [1769]   | 59 (14%) [418]     |
| Chronic obstructive pulmonary disease                   | 273 (12%) [2187]   | 208 (12%) [1769]   | 65 (16%) [418]     |
| Asthma                                                  | 274 (13%) [2187]   | 219 (12%) [1769]   | 55 (13%) [418]     |
| Diabetes (complicated and uncomplicated)                | 817 (37%) [2187]   | 655 (37%) [1769]   | 162 (39%) [418]    |
| Severe liver disease                                    | 15 (1%) [2187]     | 12 (1%) [1769]     | 3 (1%) [418]       |
| Cancer                                                  | 175 (8%) [2187]    | 144 (8%) [1769]    | 31 (7%) [418]      |
| Symptoms (yes)                                          |                    |                    |                    |
| Fatigue                                                 | 747 (34%) [2187]   | 585 (33%) [1769]   | 162 (39%) [418]    |
| Fever (subjective and objective)                        | 1827 (84%) [2187]  | 1452 (82%) [1769]  | 375 (90%) [418]    |
| Chest pain                                              | 358 (16%) [2187]   | 301 (17%) [1769]   | 57 (14%) [418]     |
| Hypoxia                                                 | 878 (40%) [2187]   | 729 (41%) [1769]   | 149 (36%) [418]    |
| First recorded heart rate                               |                    |                    |                    |
| < 90 BPM                                                | 847 (39%) [2177]   | 701 (40%) [1760]   | 146 (35%) [417]    |
| 90-100 BPM                                              | 495 (23%) [2177]   | 391 (22%) [1760]   | 104 (25%) [417]    |
| 101-124 BPM                                             | 683 (31%) [2177]   | 544 (31%) [1760]   | 139 (33%) [417]    |
| > 124 BPM                                               | 152 (7%) [2177]    | 124 (7%) [1760]    | 28 (7%) [417]      |
| First recorded respiratory rate                         |                    |                    |                    |
| < 20                                                    | 809 (38%) [2149]   | 645 (37%) [1734]   | 164 (40%) [415]    |
| 20-24                                                   | 855 (40%) [2149]   | 682 (39%) [1734]   | 173 (42%) [415]    |
| 25-30                                                   | 284 (13%) [2149]   | 240 (14%) [1734]   | 44 (11%) [415]     |
| > 30                                                    | 201 (9%) [2149]    | 167 (10%) [1734]   | 34 (8%) [415]      |

| Characteristic                                | Overall<br>[N = 2193]   | Dataset                  |                         |
|-----------------------------------------------|-------------------------|--------------------------|-------------------------|
|                                               | mean/No. (SD/%)<br>[n*] | Derivation<br>[N = 1769] | Validation<br>[N = 424] |
| First recorded systolic blood pressure        |                         |                          |                         |
| >= 101 mmHg                                   | 1997 (93%) [2154]       | 1619 (93%) [1740]        | 378 (91%) [414]         |
| 90 - 100 mmHg                                 | 101 (5%) [2154]         | 80 (5%) [1740]           | 21 (5%) [414]           |
| < 90 mmHg                                     | 56 (3%) [2154]          | 41 (2%) [1740]           | 15 (4%) [414]           |
| First recorded pulse oximetry                 |                         |                          |                         |
| 91-100%                                       | 1726 (80%) [2164]       | 1386 (79%) [1750]        | 340 (82%) [414]         |
| 81-90%                                        | 342 (16%) [2164]        | 287 (16%) [1750]         | 55 (13%) [414]          |
| 71-80%                                        | 56 (3%) [2164]          | 45 (3%) [1750]           | 11 (3%) [414]           |
| <= 70%                                        | 40 (2%) [2164]          | 32 (2%) [1750]           | 8 (2%) [414]            |
| Triage score                                  |                         |                          |                         |
| 1                                             | 112 (6%) [1880]         | 91 (6%) [1564]           | 21 (7%) [316]           |
| 2                                             | 907 (48%) [1880]        | 731 (47%) [1564]         | 176 (56%) [316]         |
| 3                                             | 753 (40%) [1880]        | 646 (41%) [1564]         | 107 (34%) [316]         |
| 4                                             | 47 (3%) [1880]          | 37 (2%) [1564]           | 10 (3%) [316]           |
| 5                                             | 61 (3%) [1880]          | 59 (4%) [1564]           | 2 (1%) [316]            |
| Highest initial creatinine (mg/dL)            | 1.6 (1.7) [2140]        | 1.7 (1.7) [1737]         | 1.5 (1.7) [403]         |
| Highest initial white blood cell count (K/uL) | 8.3 (6.4) [2154]        | 8.4 (6.7) [1750]         | 7.9 (4.4) [404]         |
| Pneumonia indication on chest x-ray (yes)     | 1618 (79%) [2054]       | 1318 (78%) [1684]        | 300 (81%) [370]         |

\* n is the number of complete cases in the data for the given variable. Percentages are calculated as No./n. SD = Standard Deviation, BPM = Beats per Minute, BMI = Body Mass Index.

**eTable 3: Full data patient characteristics, by derivation and validation set.**
